# Supplementary material for: Fabrication of novel nitrogen-doped δ-Al2O3 NPs: characterization and performance evaluation for electrocatalytic degradation of organic dyes
Source: Royal Society of Chemistry journal article supplement (doi:10.1039/d6na00277c), 2026-06-08
Supplement: d6na00277c1.pdf [file d6na00277c1.pdf]

Supplementary materials

**Fabrication of novel nitrogen-doped  $\delta$ -Al<sub>2</sub>O<sub>3</sub> NPs: Characterization and performance  
evaluation for electrocatalytic degradation of organic dyes**

Elbadawy A. Kamoun<sup>1\*</sup>, Ahmed T. Mosleh<sup>2</sup>, Habiba A. Hossni<sup>2</sup>, Tarek A. Yousef<sup>3</sup>, Nourhan A.M Ragab<sup>2</sup>, Heba Y. Zahran<sup>4</sup>, V. Ganesh<sup>4</sup>, Mohamed Hafez<sup>5,6</sup>, Ibrahim S. Yahia<sup>4\*</sup>, Shereef A. Fareed<sup>7</sup>

<sup>1</sup>*Department of Chemistry, College of Science, King Faisal University, Al-Ahsa 31982, Saudi Arabia.*

<sup>2</sup>*Nanotechnology Section., Egyptian Company for Carbon Materials, El-Sheraton/El-Nozha, Cairo, Egypt.*

<sup>3</sup>*Chemistry Department, College of Science, Imam Mohammad Ibn Saud Islamic University (IMSIU), Riyadh 11623, Saudi Arabia.*

<sup>4</sup>*Laboratory of Nano-Smart Materials for Science and Technology (LNSMST), Department of Physics, Faculty of Science, King Khalid University, P.O. Box 9004, Abha, Saudi Arabia.*

<sup>5</sup>*Faculty of Engineering and Quantity Surveying INTI, IU, Universi, Nilai, Malaysia.*

<sup>6</sup>*Faculty of Management, Shinawatra University, Pathum Thani Thailand.*

<sup>7</sup>*National Research Institute of Astronomy and Geophysics (NRIAG), Helwan 11421, Cairo, Egypt.*

\*Corresponding authors: E.A. Kamoun, E-mail: [ekamoun@kfu.edu.sa](mailto:ekamoun@kfu.edu.sa), Tel: 00201283320302, and I.S. Yahia. E-mail: [dr\\_isyahia@yahoo.com](mailto:dr_isyahia@yahoo.com).

Supplementary materials

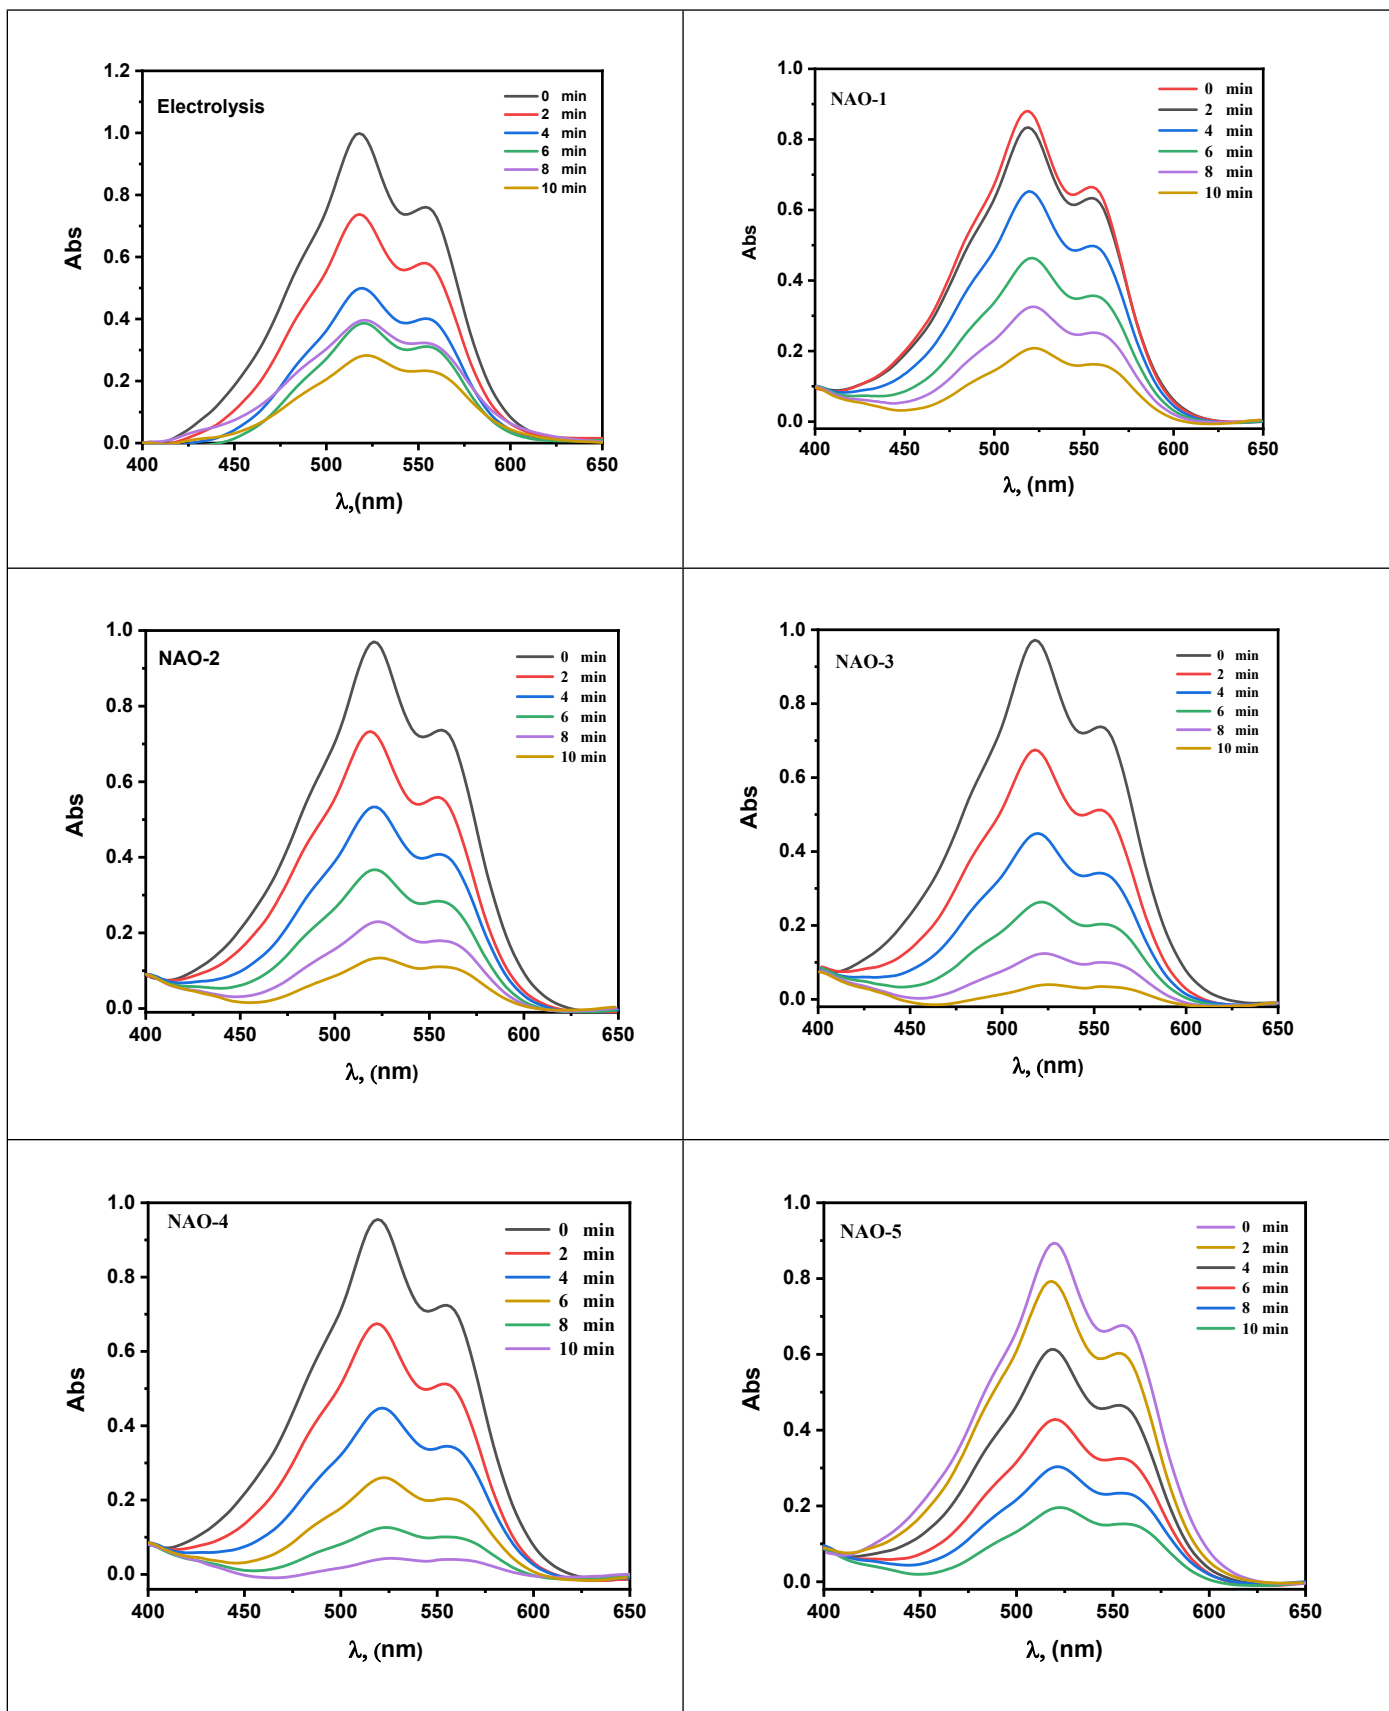

Supplementary materials

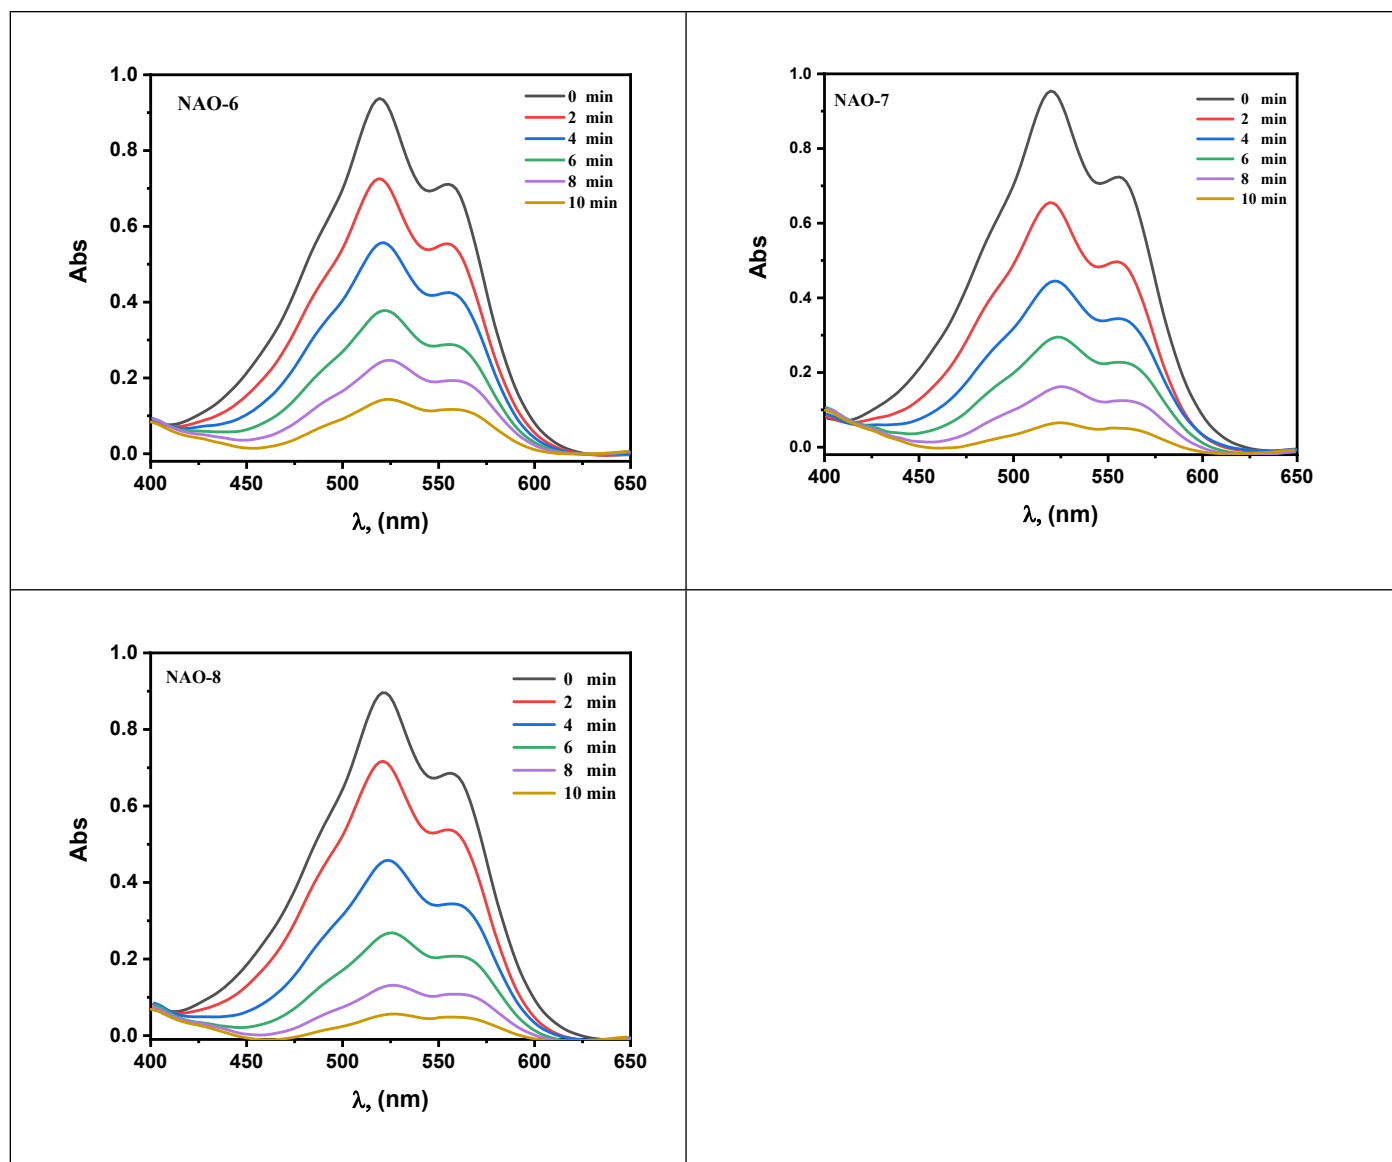

Fig. S1 UV-Vis spectra of *Carmine* dye with different NAO NPs.

Supplementary materials

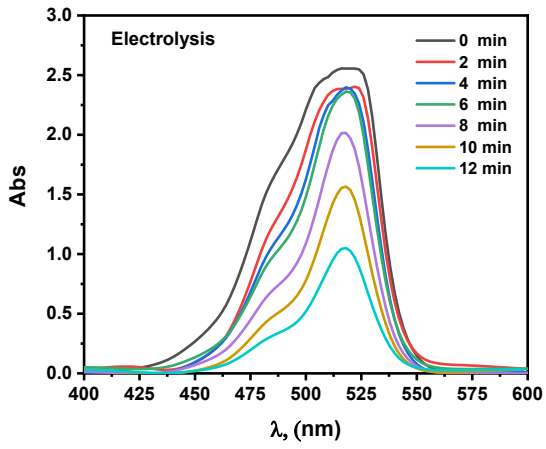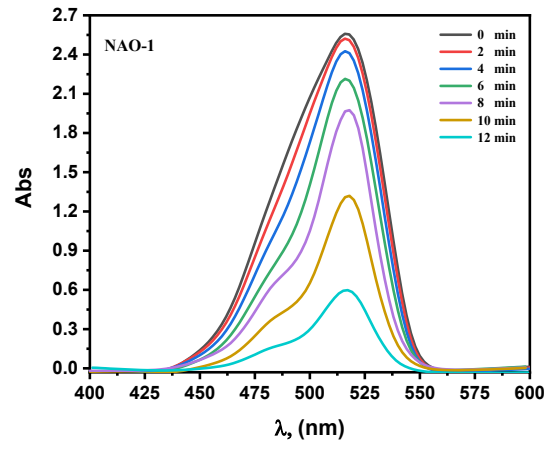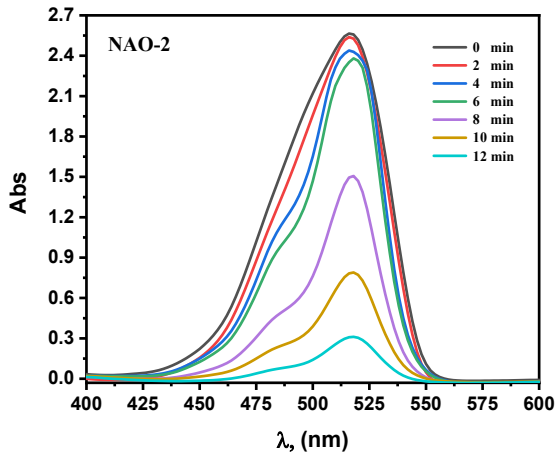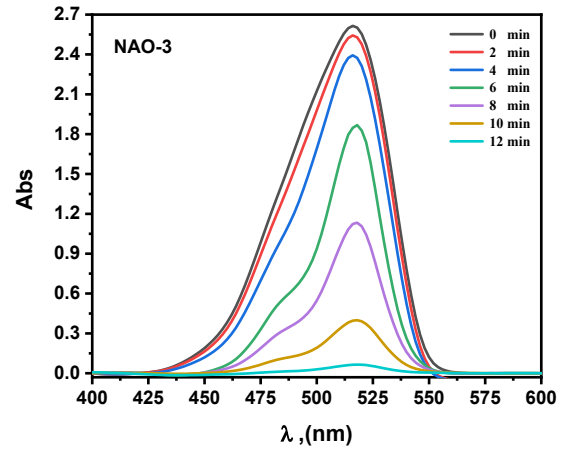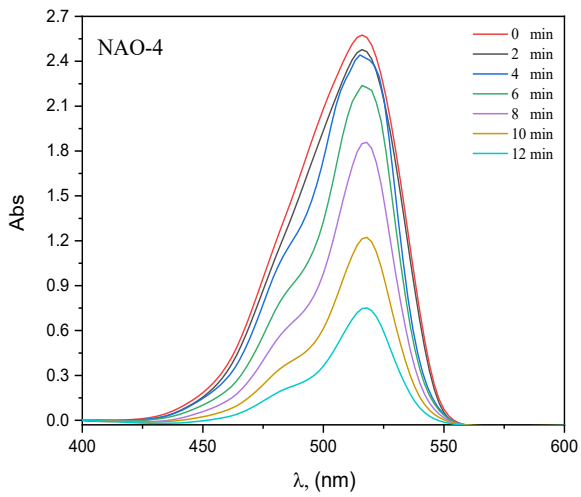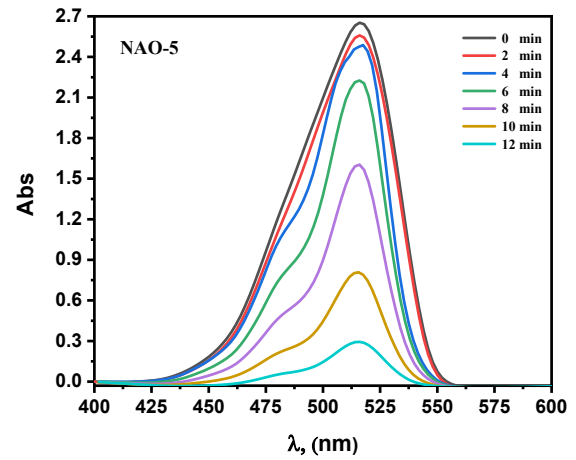

## Supplementary materials

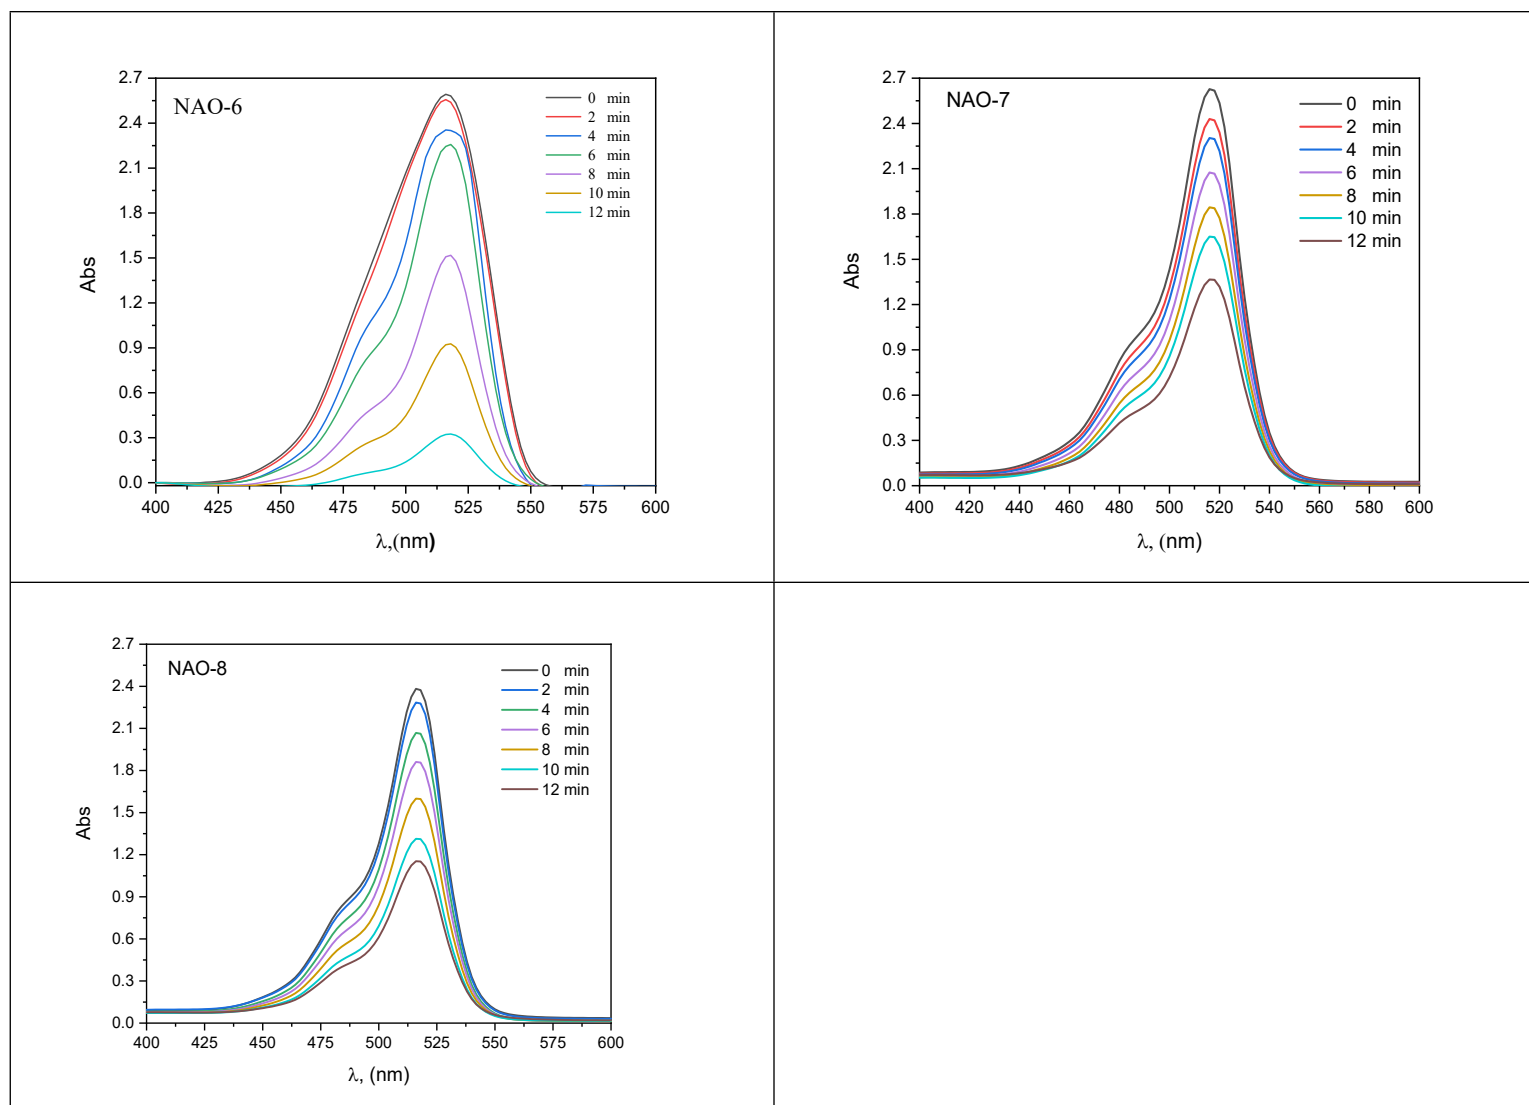

**Fig. S2** UV-Vis spectra of *Eosin yellow* dye with different NAO NPs.
